# Supplementary material for: Optimizing genomic selection of agricultural traits using K-wheat core collection
Source: PubMed Central journal article supplement (PMC10303932; doi:10.3389/fpls.2023.1112297), 2023-06-14
Supplement: Image_1.pdf [file Image_1.pdf]

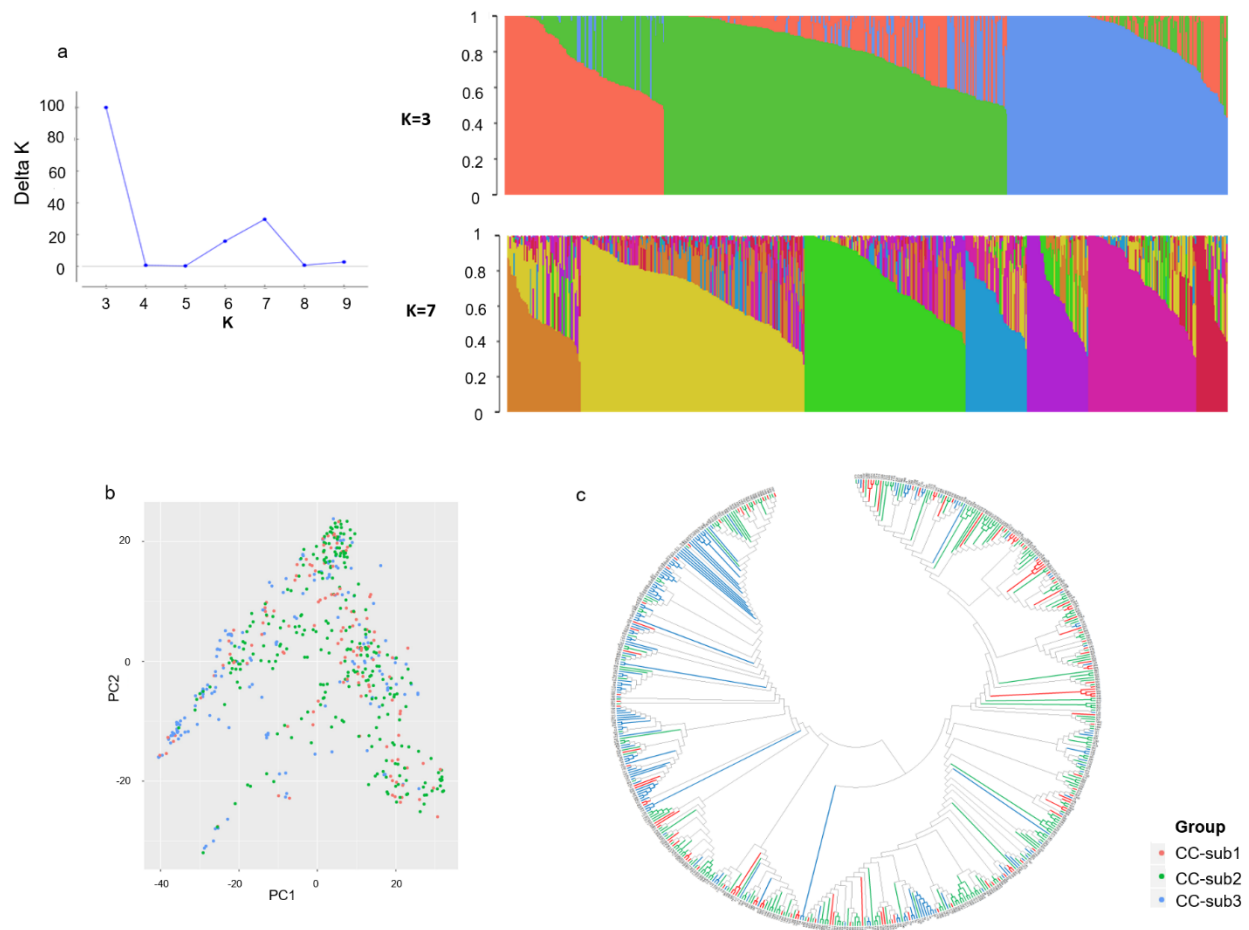

**Supplementary Figures 1.** Population structure analysis of K-wheat core collection using SNP markers. a) Evanno test and population structure results of the of CC. The population structure shows  $k=3$  and  $a=7$ . b) Principal component analysis (PCA) of the CC based on SNP markers. Based on the subpopulation structures ( $K=3$ ), the red, green, and blue dots represent CC-sub 1, CC-sub2, and CC-sub3, respectively. c) Molecular phylogenetic analysis by Maximum Likelihood method using the core collection. Phylogenetic analysis was inferred by using the Maximum Likelihood method based on the Tamura-Nei model. Phylogeny tree analyses were conducted by MEGA7 (Kumar et al., 2016). Based on the subpopulation structures ( $K=3$ ), the red, green, and blue lines indicate CC-sub 1, CC-sub2, and CC-sub3, respectively.
