# Supplementary material for: Optimizing genomic selection of agricultural traits using K-wheat core collection
Source: Frontiers journal article supplement (doi:10.3389/fpls.2023.1112297), 2023-06-14
Supplement: Table_1.xlsx [file Table_1.xlsx]

## Sheet: Table_1
Supplementary Table 1. List of K-wheat core collection and K-wheat mini core collection. Contains basic information about all accessions.
#	Accession ID	IT numbera	Accession name	Country of originb	Status	K-wheat mini CCc
1	3	10789	Jaerae Somaek	KOR	Landrace	-
2	4	10803	Samcheok 9	KOR	Landrace	-
3	6	11019	Barletta 77	ARG	Landrace	-
4	12	12006	EXTRA EARLY BLACKHULL	USA	Breeders line	+
5	14	12256	Hwa Nong 1	CHN	Landrace	-
6	16	12360	HYBRIDE 46	FRA	Breeders line	+
7	21	12752	D.I.V.6688	ARG	Landrace	-
8	22	12753	D.I.V. 6689	ARG	Landrace	-
9	23	12754	D.I.V.6694	ARG	Landrace	+
10	24	12773	Bordeaux	FRA	Breeders line	+
11	26	12846	Norin16	JPN	Breeders line	+
12	28	12931	Hybrid 481	RUS	Breeders line	-
13	31	13280	BELOTURKA	RUS		-
14	32	13297	BRONZE	USA	Breeders line	-
15	34	13636	Blanquillo de Toledo	ESP	Landrace	+
16	36	13742	KOOPERATORKA	UKR	Breeders line	+
17	38	13797	PI166638	TUR	Landrace	+
18	40	13885	Jingwang	KOR	Breeders line	+
19	41	13887	Jaerae Somaek	KOR	Landrace	-
20	42	13892	Chinkwang	KOR	Breeders line	-
21	43	13893	Jinke 107	KOR		+
22	44	13894	Cheong Mil	KOR	Breeders line	-
23	45	14220	BRILL	USA	Breeders line	-
24	46	14286	Nae Mil	KOR	Breeders line	-
25	48	14292	Singwang	KOR	Breeders line	+
26	50	14297	Geuru Mil	KOR	Breeders line	+
27	51	14298	Suwon 214	KOR	Breeders line	-
28	55	14303	Suwon 218	KOR	Breeders line	-
29	57	14308	Eunpa Mil	KOR	Breeders line	-
30	58	14309	Suwon 225	KOR	Breeders line	-
31	59	14310	Suwon 209	KOR	Breeders line	+
32	60	14311	Suwon 208	KOR	Breeders line	-
33	69	14373	Milyang 8	KOR	Breeders line	-
34	70	14403	Bezostaja	RUS	Breeders line	+
35	74	14591	W5 5787	Unknown		-
36	75	14701	BEZOSTAJA	RUS	Breeders line	-
37	76	14717	CHAT'S'	MEX		-
38	77	15037	Bolu	TUR	Landrace	+
39	80	15108	W571	Unknown		+
40	81	15164	Milyang 17	KOR	Breeders line	+
41	82	15165	Milyang 18	KOR	Breeders line	+
42	84	15556	Somaek Jaerae	KOR	Landrace	-
43	85	15569	Jaerae Somaek	KOR	Landrace	-
44	88	15780	Dahong Mil	KOR	Breeders line	-
45	90	15785	Ahome	Unknown		-
46	91	15804	Auther 2-7 C-1	Unknown		-
47	94	15844	Milyang 10	KOR	Breeders line	+
48	95	15855	Milyang 11	KOR	Breeders line	-
49	97	15862	Milyang 12	KOR	Breeders line	+
50	98	15864	Milyang 13	KOR	Breeders line	-
51	100	15866	Milyang 15	KOR	Breeders line	-
52	101	15924	Milyang 20	KOR	Breeders line	-
53	102	15938	Milyang 21	KOR	Breeders line	-
54	103	15975	Milyang 24	KOR	Breeders line	-
55	104	16039	Dong Buk 143	JPN		+
56	105	16056	Milyang 25	KOR	Breeders line	-
57	106	16075	Floreolo	Unknown		-
58	107	16199	Jaekwang	KOR	Breeders line	-
59	109	16320	Suwon 222	PRK	Breeders line	-
60	110	16361	Suwon 229	KOR	Breeders line	+
61	111	16374	No 50	Unknown		-
62	112	16389	Norin 6	JPN	Breeders line	+
63	113	16394	Norin 12	JPN	Breeders line	+
64	114	16410	Norin 35	JPN		-
65	115	16411	Norin 36	JPN		-
66	117	16476	Octo Bulk - Bush	Unknown		+
67	118	16531	Ri4215	Unknown		+
68	119	16532	RMN F49-70	Unknown		+
69	120	16581	Sturdy	Unknown		-
70	121	16762	Thurorato-1	Unknown		-
71	122	16848	EuAnET Tou	Unknown		-
72	123	16855	7301	Unknown		+
73	124	16857	P59(DOR TUGAL)	Unknown		-
74	125	16869	9 SE	Unknown		-
75	126	16893	DANCHI GOMUGI	Unknown		-
76	127	16922	CI17936	USA		+
77	128	16923	CI17935	USA		+
78	129	16924	CI17934	USA	Breeders line	-
79	130	16934	CI17752	CAN	Breeders line	-
80	131	16935	CI17751	CAN	Breeders line	-
81	132	16939	CI17738	USA	Breeders line	+
82	133	16942	CI17700	USA		+
83	134	16970	Chapingo	Unknown		-
84	135	16998	Nont M67-son 64 Kirend	Unknown		-
85	136	100791	Buyeo-1985-791	KOR	Landrace	-
86	137	100882	Cham Mil	KOR	Landrace	-
87	138	100948	Yangpyeong-1985-948	KOR	Landrace	+
88	139	100969	Gyeongbuk Chilgok-1985-969	KOR	Landrace	-
89	140	101053	Jeonbuk Gochang-1985-1053	KOR	Landrace	-
90	141	103011	Gyeongbuk Geumneung-1985-3011	KOR	Landrace	-
91	142	103260	Gyeongnam Tongyeong-1985-3260	KOR	Landrace	-
92	143	103698	Gyeongnam Geochang-1985-3698	KOR	Landrace	-
93	145	104026	Jeonbuk Gimje-1985-4026	KOR	Landrace	+
94	147	104950	Gyeongnam Goseong-1985-4950	KOR	Landrace	+
95	148	105806	Gyeongbuk Andong-1985-5806	KOR	Landrace	+
96	149	111108	Jeonnam Hampyeong-1985-11108	KOR	Landrace	+
97	150	112968	Jeonbuk Gimje-1985-12968	KOR	Landrace	-
98	151	112991	Jeonbuk Gimje-1985-12991	KOR	Landrace	-
99	153	113352	CI15929	USA	Breeders line	+
100	154	116052	Kyodo shinriki	JPN	Breeders line	-
101	155	116100	Suwon 221	KOR	Breeders line	-
102	156	116104	Akadaruma	JPN	Breeders line	+
103	157	116109	Cheonggye Mil	KOR	Breeders line	+
104	158	116111	Milyang 19	KOR	Breeders line	-
105	159	116114	Suwon 228	KOR	Breeders line	-
106	161	116116	Suwon 226	KOR	Breeders line	-
107	162	116118	Sae Mil	KOR	Breeders line	+
108	163	116119	Suwon 233	KOR	Breeders line	-
109	165	116127	Milyang 22	KOR	Breeders line	-
110	166	116148	Suwon 204	KOR	Breeders line	-
111	169	116162	O-wolsomaeg	KOR	Breeders line	+
112	170	116201	jogwang	KOR	Breeders line	-
113	172	116253	Jaerae Somaek	KOR	Landrace	+
114	173	116362	Milyang 26	KOR	Breeders line	-
115	174	116363	Milyang 27	KOR	Breeders line	-
116	175	118995	Joseon Mil	KOR	Landrace	+
117	176	118996	Gyeongbuk Gyeongsan-1986-5255	KOR	Landrace	-
118	177	119904	Gyeongbuk Sangju-1986-6163	KOR	Landrace	-
119	178	119906	Gyeongbuk Sangju-1986-6165	KOR	Landrace	-
120	180	137104	Rasuwa Local	NPL	Landrace	+
121	181	137106	Dabdi Local AOB	NPL	Landrace	+
122	182	140894	SWM789783	Unknown		-
123	183	141000	Nonglim4	JPN	Breeders line	-
124	184	141039	FEDERATION	MEX		-
125	185	141220	NP-880	Unknown		+
126	186	151030	Jaeraejong Mil	KOR	Landrace	-
127	187	151031	Jaeraejong Mil	KOR	Landrace	-
128	188	151032	Jaeraejong Mil	KOR	Landrace	-
129	189	151034	Jaeraejong Mil	KOR	Landrace	+
130	190	151036	Jaeraejong Mil	KOR	Landrace	-
131	194	151041	Jaeraejong Mil	KOR	Landrace	-
132	195	151042	Jaeraejong Mil	KOR	Landrace	-
133	197	151045	Jaeraejong Mil	KOR	Landrace	-
134	198	151047	Jaeraejong Mil	KOR	Landrace	+
135	201	151050	Jaeraejong Mil	KOR	Landrace	+
136	207	151056	Jaeraejong Mil	KOR	Landrace	+
137	210	151061	Jaeraejong Mil	KOR	Landrace	-
138	216	151067	Jaeraejong Mil	KOR	Landrace	-
139	217	151068	Jaeraejong Mil	KOR	Landrace	-
140	218	151069	Jaeraejong Mil	KOR	Landrace	-
141	220	151074	Jaeraejong Mil	KOR	Landrace	-
142	221	151079	Jinpung	KOR	Breeders line	+
143	228	159740	Jaeraejong Mil	KOR	Landrace	-
144	229	159741	Jaeraejong Mil	KOR	Landrace	-
145	230	159742	Jaeraejong Mil	KOR	Landrace	-
146	234	159746	Jaeraejong Mil	KOR	Landrace	-
147	237	159750	Jaeraejong Mil	KOR	Landrace	+
148	242	159755	Jaeraejong Mil	KOR	Landrace	-
149	243	159756	Jaeraejong Mil	KOR	Landrace	-
150	245	159758	Jaeraejong Mil	KOR	Landrace	-
151	247	159760	Jaeraejong Mil	KOR	Landrace	+
152	252	159769	Jaeraejong Mil	KOR	Landrace	-
153	261	159778	Jaeraejong Mil	KOR	Landrace	-
154	265	159782	Jaeraejong Mil	KOR	Landrace	-
155	267	159785	Jaeraejong Mil	KOR	Landrace	-
156	272	165921	YM1#6-26B-0Y	Unknown		-
157	276	165937	SANDO 7	Unknown		+
158	277	165939	LAJ 2489	Unknown		+
159	281	166010	BAI HUO MAI	Unknown		-
160	282	166019	BEIJING 3	Unknown		-
161	285	166043	FENG CHAN 3	CHN	Breeders line	-
162	288	166157	72952	Unknown		+
163	290	166162	72957	Unknown		-
164	291	166166	72961	Unknown		-
165	292	166170	72965	Unknown		-
166	295	166189	MV-15	Unknown		+
167	297	166192	72993	Unknown		+
168	312	166271	73075	Unknown		-
169	316	166278	73082	Unknown		+
170	326	166304	73110	Unknown		+
171	330	166331	L882-1AP-2AP-0AP	Unknown		+
172	333	166350	VEE#4	Unknown		-
173	335	166352	GENARO 81	Unknown		+
174	340	166361	CM58924-1AP-1AP-2AP	Unknown		-
175	349	166378	CM64693-3M-1Y-1M-1Y-0M	Unknown		-
176	350	166379	CM69279-C-2Y-1M-5Y-1M-0Y	Unknown		-
177	351	166380	KEA&quot;S&quot;	Unknown		+
178	353	166382	73189	Unknown		-
179	361	166396	CM42402-30Y-1M-1Y-3M-2Y-0B	Unknown		-
180	364	166401	CM62661-D-1M-1Y-4M-1Y-0M	Unknown		+
181	366	166403	SWM2895-3L-1AP-2AP-AP-0AP	Unknown		-
182	381	166473	AROMO	Unknown		-
183	383	166514	73332	Unknown		-
184	384	172165	Jaeraejong Mil	KOR	Landrace	-
185	387	172219	Suwon 248	KOR	Breeders line	-
186	389	173163	Luk-Sen No.3	PRK	Breeders line	-
187	391	173165	Ten-Juk No.1	PRK	Breeders line	-
188	398	175528	Suwon 240	KOR	Breeders line	-
189	402	175533	Suwon 245	KOR	Breeders line	-
190	403	175534	Suwon 246	KOR	Breeders line	-
191	404	175535	Suwon 247	KOR	Breeders line	-
192	406	175568	Suwon 251	KOR	Breeders line	+
193	409	175571	Suwon 254	KOR	Breeders line	-
194	412	175948	Gyeongbuk Bonghwa-1992-2790	KOR	Landrace	-
195	417	176586	Alton	UKR	Breeders line	+
196	418	176688	JPN-1992-3530	Unknown		+
197	419	179240	SHA 4	Unknown		+
198	421	185727	Gyeongnam Tongyeong-1994-3388	KOR	Landrace	+
199	422	185728	Jeonnam Damyang-1994-3389	KOR	Landrace	-
200	426	188157	Registan	UZB	Breeders line	+
201	431	194722	Local	MNG		-
202	432	198010	Zyrianovka	RUS		-
203	433	198070	Uoran	USA		+
204	435	198077	Cajeme	MEX		-
205	438	198149	Dimrovka 5-27	BGR		-
206	441	198174	U00010257	MEX		-
207	442	198176	U00010123	Unknown		+
208	443	198178	U00010258	MEX		-
209	444	198179	U00010158	MEX		-
210	448	198191	U5311672 1487-85	FIN		+
211	453	198219	U00010227	MEX		-
212	456	198224	U00010235	MEX		+
213	461	198240	U00010164	MEX		+
214	466	198252	U00010215	MEX		-
215	469	198259	U00010204	MEX		+
216	472	198292	U0001084	USA		-
217	473	198293	U0001085	USA		+
218	474	198297	U0001086	USA		+
219	476	198320	Sugmuxi	Unknown		-
220	477	198321	U0007103	COL		-
221	479	198324	U0007106	COL		-
222	480	198325	U0007108	COL		+
223	481	198333	C©ü2676 u207/711	MEX		-
224	484	198339	1330che Gzono5	CHN		-
225	490	198388	U00010189	MEX		+
226	495	198443	MK4086	Unknown		+
227	501	198511	1657 Agra	IND		-
228	505	198610	HCWSN NO61.K(HL)740.6(BNH)	Unknown		-
229	506	198691	GENARO-81	MEX		+
230	507	198706	CHAPINGO 74	Unknown		-
231	509	198726	KTM	NLD		-
232	512	205557	ONOKHOISKI 4	RUS		+
233	513	205573	MANOBA-1	CAN		+
234	514	205574	MANOBA-3	CAN		+
235	520	205631	FRONTANA	BRA		-
236	525	205673	MK4860	MEX		-
237	529	205724	MK5681	IND		+
238	538	205779	NISU	ITA		-
239	543	205816	HABB	Unknown		+
240	544	205847	U13931	CAN		-
241	552	205881	WORLD SEED 1651	USA		+
242	553	205885	ZORAWAR 71	LBN		-
243	556	205891	KALAM 71	PAK		-
244	560	205962	WIR667	ROU		-
245	567	206152	WIR8165	UKR		-
246	568	206168	Belokorka	UKR		-
247	569	206235	WIR9411	RUS		+
248	570	206347	Ostistaya 2	UKR		-
249	572	207015	Jeonnam Suncheon-1998-6295	KOR	Landrace	+
250	574	210275	MK5931	Unknown		-
251	576	210284	Floro XCo	AUS		+
252	585	210334	Local	TUR		+
253	587	210342	Local	TUR		-
254	588	210343	Local	TUR		+
255	594	210370	MK7373	MNG		-
256	595	210374	Kinelskay	RUS		+
257	597	210388	Lee	USA		-
258	598	210389	Insignia	AUS		+
259	599	210390	YSWR-N-30	CAN		-
260	605	210416	MK7525	MNG		+
261	608	210428	MK2381	MEX		+
262	618	210444	MK2538	MEX		-
263	619	210445	MK2539	MEX		+
264	620	210454	MK2570	MEX		-
265	621	210455	MK2572	MEX		-
266	622	210456	MK2573	MEX		-
267	623	210458	MK2576	MEX		-
268	627	210462	MK2584	MEX		-
269	628	210463	MK2587	MEX		+
270	630	210465	MK2590	MEX		+
271	635	210470	MK2601	MEX		-
272	637	210472	MK2603	MEX		-
273	642	210477	MK2611	MEX		-
274	644	210485	MK2622	MEX		+
275	646	210493	MK2639	MEX		-
276	649	210496	Nacozari-	MEX		+
277	655	210505	MK2673	MEX		+
278	657	210508	MK2680	MEX		-
279	658	210509	MK2681	MEX		-
280	660	210511	MK2684	MEX		+
281	664	212223	Gyeongnam Tongyeong-2000-44	KOR	Landrace	+
282	667	212976	MK2402	MEX		+
283	668	212977	MK2450	MEX		-
284	669	212978	MK2453	MEX		-
285	671	212980	MK2512	MEX		-
286	672	212981	MK2514	MEX		+
287	673	212982	MK2686	MEX		-
288	676	213100	Keumgang Mil	KOR	Breeders line	-
289	678	213102	Suwon 281	KOR	Breeders line	-
290	694	213804	MK2675	MEX		-
291	699	213926	Local	MNG		+
292	700	214521	MK2565	MEX		-
293	718	225480	Hamlet, W-97	USA	Breeders line	+
294	719	225481	Ga-Gore	USA	Breeders line	+
295	721	227071	Iksan 313	KOR	Breeders line	-
296	735	229787	Long fu	CHN	Landrace	-
297	740	229932	Xuzhou 27	CHN	Breeders line	-
298	761	230945	PI 474581	USA	Breeders line	+
299	762	230946	Arkan	USA	Breeders line	+
300	767	230952	Compton	USA	Breeders line	+
301	770	230955	Cody	USA	Breeders line	-
302	774	230959	Adder	USA	Breeders line	+
303	777	230962	PI 495594	USA	Breeders line	-
304	778	230963	PI 495595	USA	Breeders line	-
305	782	230967	Dodge	USA	Breeders line	-
306	783	230968	Norkan	USA	Breeders line	-
307	784	230969	GR863	USA	Breeders line	-
308	786	230971	PI 508289	USA	Breeders line	-
309	787	230972	PI 510665	USA	Breeders line	+
310	790	230975	PI 527481	USA	Breeders line	+
311	794	230980	NE82438	USA	Breeders line	+
312	804	230992	Ac Reed	CAN	Breeders line	-
313	807	230995	Erhardt	USA	Breeders line	+
314	808	231255	KLB103.71-20Y-8M-1100YK-0ARG	MEX	Breeders line	-
315	810	231257	Fundacep 30	MEX	Breeders line	-
316	816	235003	CMSW96WM00658S-15M-010Y-010M-010SY-3M-0Y-020SCM-0Y	MEX	Breeders line	+
317	817	235006	ICW88.0534-4AP-0L-5AP-0AP-0BR-0BR-0AP-6KBY-0Y-4M-0Y-05SCM-0Y	MEX	Breeders line	+
318	818	235035	CMSS99M01024S-040M-030Y-030M-3Y-3M-0Y	MEX	Breeders line	+
319	819	235042	CMSS99M01622T-040Y-040M-040Y-69M-0ERLFY-3M-0Y-0RGMXI	MEX	Breeders line	+
320	820	235046	CMSS99M00919S-0P0M-040SY-040M-040SY-10M-0ZTB-0SY-0RGMXI	MEX	Breeders line	-
321	821	235235	CSSS00B00011S-2Y-10M-2Y-8FGR-1Y-0FGR-0BI	MEX	Breeders line	-
322	824	235246	CMSS99M02148S-040M-040SY-040M-040SY-16M-0ZTB-0SY	MEX	Breeders line	+
323	826	235258	CMSS98Y02950T-040M-0100M-040Y-040M-030Y-45M-1Y-0M	MEX	Breeders line	-
324	829	235356	CHN-AWS-2010-1	CHN	Landrace	-
325	834	237013	A1BM0324	BGR	Breeders line	-
326	836	237019	A1BM0321	BGR	Breeders line	+
327	842	237796	Iksan 346	KOR	Breeders line	+
328	845	237807	Iksan 347	KOR	Breeders line	-
329	847	237809	Iksan 349	KOR	Breeders line	-
330	851	246360	MK2422	MEX		+
331	852	246361	MK2508	MEX		-
332	853	246550	Gyeongnam Geoje-2000-13	KOR	Landrace	-
333	856	246570	Miryang 32	KOR	Breeders line	+
334	857	246571	Miryang 34	KOR	Breeders line	+
335	859	246573	NINGMAI 7	CHN	Breeders line	+
336	862	246589	GRSS93SH18-0M-12SH-2M-1Y-4M-0Y	MEX	Breeders line	-
337	865	246855	A1BM0293	BGR	Breeders line	-
338	866	246968	Chousen 65	KOR	Landrace	-
339	867	246977	Chuuhoku Zairai	KOR	Landrace	+
340	868	246980	Korea 1	KOR	Landrace	-
341	869	246981	Korea 2	KOR	Landrace	-
342	871	246990	Suweon 220	KOR	Landrace	-
343	874	250812	BORLAUG M95	MEX	Breeders line	+
344	875	250850	satanta	USA	Breeders line	-
345	879	250944	PI 561933	USA	Breeders line	+
346	884	266794	ATTILA*2/PBW65/6/PVN//CAR422/ANA/5/BOW/CROW/¡¦	MEX	Breeders line	-
347	891	266836	ATTILA*2/PBW65//TAM200/TUI	MEX	Breeders line	-
348	894	266862	AC SPLENDOR/4/SNI/TRAP#1/3/KAUZ*2/TRAP//KAUZ	MEX	Breeders line	-
349	901	266927	AMIDON/HEILO//KEFENG 6	MEX	Breeders line	-
350	902	266930	CHEN/AEGILOPS SQUARROSA (TAUS)//FCT/3/STAR/¡¦	MEX	Breeders line	+
351	907	266993	ACHTAR/4/MILAN/KAUZ//PRINIA/3/BAV92	MEX	Breeders line	-
352	914	267056	BAV92//IRENA/KAUZ/3/HUES/4/DOLL	MEX	Breeders line	-
353	922	267139	ALTAR 84/AE.SQ//OPATA/3/2*WH 542/7/VEE#8//¡¦	MEX	Breeders line	+
354	926	267151	ATTILA*2/HUES//FINSI/3/ATTILA*2/PBW65	MEX	Breeders line	-
355	930	267161	CM91045-5Y-0M-0Y-4M-2Y-0YZ-010M-0Y-3M-010Y-0FUS-¡¦	MEX	Breeders line	-
356	932	267164	Darkhan-72 /Saratovskaya 36 x Buryatskaya 79	MNG	Breeders line	+
357	936	267182	MNG-KJG-2012-13	MNG	Breeders line	+
358	951	269144	CM95439-63Y-0H-0SY-5M-0RES-0SY	MEX	Breeders line	-
359	953	269163	ALTAR 84/AE.SQ//OPATA/3/2*WH 542/4/BONASA/5/¡¦	MEX	Breeders line	+
360	954	269174	CMSS98M00715T-040Y-0100M-040Y-040M-030Y-16M-3Y-0M	MEX	Breeders line	-
361	955	269175	CMSS98M00910T-040Y-0100M-040Y-040M-030Y-45M-2Y-0M	MEX	Breeders line	-
362	958	269178	CMSS98Y01925T-040M-8SY-0M-010Y-010M-12Y-1M-0Y	MEX	Breeders line	+
363	960	269180	CMSS98Y05022S-020Y-030M-020Y-040M-15Y-1M-0Y	MEX	Breeders line	+
364	962	269182	CMSS98Y05678S-0100M-040Y-040M-030Y-24M-2Y-0M	MEX	Breeders line	-
365	963	269193	Caledonia	USA	Breeders line	+
366	969	269207	Ferrugineum 59	UKR	Breeders line	+
367	970	269211	Gondo	MEX	Breeders line	-
368	979	269234	KS92WGRC21	USA	Breeders line	+
369	982	269241	Klein Cacique	MEX	Breeders line	+
370	986	269251	CHN-HYW-2002-5	CHN	Landrace	+
371	987	269252	CHN-HYW-2002-6	CHN	Landrace	-
372	988	269253	Luganka	UKR	Breeders line	-
373	991	269318	C147-13C-3C-5C-2C-0C	MEX	Breeders line	+
374	994	269323	H1443-3H-0CHL	MEX	Breeders line	-
375	995	269328	MK2393	MEX		-
376	1001	269353	Cr 4898	RUS	Breeders line	-
377	1006	269392	PC Medium-2575	MEX	Breeders line	+
378	1009	269396	CM33203-M-8M-8Y-1M-1Y-1M-0Y-1T-2T-0ARG	MEX	Breeders line	-
379	1010	269397	CI 6607	USA	Breeders line	-
380	1012	269399	CI 5868	USA	Breeders line	-
381	1013	269400	ICARDA-IG-89440	ETH	Landrace	+
382	1019	269439	MN73168	MEX	Breeders line	-
383	1022	269476	trego	USA	Breeders line	-
384	1035	269493	Iksan 343	KOR	Breeders line	-
385	1048	275743	Iksan 369	KOR	Breeders line	-
386	1054	275961	Kakatsi	MEX	Breeders line	+
387	1058	275975	Gaoyuan 602	MEX	Breeders line	-
388	1063	278239	CMH87.544-C-1Y-3B-1B-2B-0Y	MEX	Breeders line	-
389	1068	279496	AUS 4589	GRC	Landrace	+
390	1070	279500	Chinese 466	ARG	Landrace	+
391	1072	279503	CI 14614	ETH	Landrace	-
392	1073	279504	CI 14633	ETH	Landrace	-
393	1074	279505	CI 14640	ETH	Landrace	-
394	1075	279506	CI 14644	ETH	Landrace	+
395	1079	279510	CI 14674	ETH	Landrace	-
396	1080	279511	CI 14678	ETH	Landrace	-
397	1082	279513	CI 14710	ETH	Landrace	-
398	1083	279514	CI 14717	ETH	Landrace	-
399	1084	279515	CI 14719	ETH	Landrace	+
400	1087	279518	CI 14729	ETH	Landrace	+
401	1088	279519	CI 14740	ETH	Landrace	+
402	1090	279521	CI 14775	ETH	Landrace	-
403	1092	279523	CI 14799	ETH	Landrace	-
404	1093	279524	CI 14890	ETH	Landrace	-
405	1094	279533	CI 15142	SAU	Landrace	+
406	1102	279554	CI 4412	CAN	Breeders line	-
407	1106	279566	CI 5928	USA	Breeders line	-
408	1107	279569	CI 6450	USA	Breeders line	+
409	1108	279575	CI 7581	RUS	Landrace	-
410	1113	279596	C 7142	GRC	Landrace	+
411	1128	284661	Florio	ITA	Breeders line	-
412	1143	284987	Saribas	TUR	Landrace	-
413	1147	285015	Moro of Sind	PAK	Landrace	+
414	1162	285048	AUS 8920	BIH	Landrace	-
415	1163	285049	Ranka Brkulja	BIH	Landrace	+
416	1164	285088	AUS 8947	TUR	Landrace	-
417	1175	289625	Asosan	JPN	Breeders line	+
418	1177	290082	PI 534284	ETH	Landrace	+
419	1178	290083	MG 07739	ETH	Landrace	-
420	1179	290084	MG 07741	ETH	Landrace	-
421	1180	290085	MG 07751	ETH	Landrace	+
422	1183	290107	Cr 15294	AFG	Landrace	+
423	1191	290311	Aztec	USA	Breeders line	+
424	1198	291179	CMSS92M03482T-015M-0Y-0Y-050M-23Y-2M-0Y	MEX	Breeders line	-
425	1203	291184	CMBW01Y01692S-6Y-2AL-3AL-010Y-8M-0Y	MEX	Breeders line	-
426	1209	291193	CMSS92Y01399T-2Y-010M-010Y-010Y-5M-0Y-0HTY	MEX	Breeders line	-
427	1211	291198	CM103873-2M-030Y-020Y-010M-4Y-0M-10PZ-0Y-1SCM-0Y-2SCM-2PZ-OY-SCM-0Y	MEX	Breeders line	+
428	1212	291199	CMBW90M1671-34M-2AL-0AL-07Y-2M-0Y-2SJ-0Y-OSCM-0Y	MEX	Breeders line	-
429	1213	291201	CM91046-7Y-0M-0Y-4M-8Y-0B-0FC-1FUS-0Y-0E-0ECU-0SCM-0Y	MEX	Breeders line	+
430	1214	291202	CMBW91Y02939M-030TOPM-9Y-010M-010Y-015M-3Y-0M-0E-0ECU-0SCM-0Y	MEX	Breeders line	+
431	1220	291210	CHN-HYW-2002-4	CHN	Landrace	-
432	1223	291264	CM81A.528-1B-1Y-2B-1Y-0B	MEX	Breeders line	+
433	1231	291272	CM64624-2Y-1M-4Y-0M-34Y-0M-0MEX	MEX	Breeders line	-
434	1234	292986	WIR9708	RUS	Breeders line	-
435	1235	293068	Roblin	CAN	Breeders line	-
436	1237	293422	A1BM0311	BGR	Breeders line	+
437	1248	293489	yv 03-309	CHN	Breeders line	+
438	1249	293490	yv 03-311	CHN	Breeders line	+
439	1253	293499	yv 03-338	CHN	Breeders line	+
440	1261	293533	yv 98-9	CHN	Breeders line	-
441	1263	293547	832-714	CHN	Breeders line	-
442	1270	293595	yv 93-105	CHN	Landrace	+
443	1280	293605	De 93-6	CHN	Landrace	+
444	1284	293609	yv 99-51	CHN	Landrace	-
445	1286	293611	yv 99-56	CHN	Landrace	+
446	1292	293617	yv 99-63	CHN	Landrace	-
447	1297	293622	yv 99-69	CHN	Landrace	-
448	1299	293624	yv 99-71	CHN	Landrace	-
449	1301	293626	yv 99-73	CHN	Landrace	+
450	1308	293633	yv 00-2	CHN	Landrace	+
451	1311	293636	Fengxi 7849	CHN	Breeders line	-
452	1313	293639	819M4-2-6	CHN	Breeders line	+
453	1326	293653	S 181	CHN	Breeders line	+
454	1329	293656	Chumai 8805	CHN	Breeders line	+
455	1356	293861	NC 20761	KGZ	Landrace	+
456	1360	293882	Bouquet	FRA	Breeders line	+
457	1364	293905	Iksan 335	KOR	Breeders line	+
458	1383	295453	k3051	AFG	Landrace	+
459	1395	295465	k3090	AFG	Landrace	+
460	1397	295467	k3094	AFG	Landrace	+
461	1398	295468	k3097	AFG	Landrace	+
462	1400	295470	k3102	AFG	Landrace	-
463	1408	295479	k3161	AFG	Landrace	-
464	1424	295496	k3249	AFG	Landrace	+
465	1425	295497	k3253	AFG	Landrace	-
466	1431	295508	Samma	SAU	Landrace	+
467	1437	295544	Gandom	PAK	Landrace	-
468	1446	297608	AUS 9316	ETH	Landrace	+
469	1454	297824	Almadense	PRT	Landrace	-
470	1457	297827	Eborense	PRT	Landrace	+
471	1460	297830	Da Grecia	PRT	Landrace	-
472	1463	297834	Mole Algarvio	PRT	Landrace	+
473	1471	297843	Tremes Ruivo	PRT	Landrace	+
474	1484	297908	CI 3079	RUS	Landrace	+
475	1493	297931	Kara Keltek	UZB	Landrace	-
476	1498	297952	S1793	IND	Landrace	-
477	1499	297953	India 164	IND	Landrace	-
478	1501	297955	India 196	IND	Landrace	+
479	1503	297960	Restauracao	PRT	Breeders line	-
480	1507	297970	Barbaro 789	PRT	Breeders line	+
481	1511	298016	Hezohegyesi 7286	HUN	Breeders line	-
482	1512	298021	Alcsuti 21	HUN	Breeders line	+
483	1514	298028	Mindszentpusztai	HUN		+
484	1516	298040	Pyrothryx	HUN	Breeders line	+
485	1522	298063	Varna 40	BGR	Landrace	-
486	1524	298065	Canary 3	ESP	Landrace	+
487	1525	298066	Canary 4	ESP	Landrace	+
488	1526	298067	Canary 5	ESP	Landrace	+
489	1527	298068	AUS 13025	EGY	Landrace	+
490	1528	298069	Sinai 4	EGY	Landrace	-
491	1540	298086	Salonika 11	GRC	Landrace	+
492	1561	298115	Portugal 150	PRT	Landrace	+
493	1566	298149	Rooi Kleinkoren	ZAF	Breeders line	-
494	1569	298152	Beyrouth 3	LBN	Landrace	+
495	1571	298154	Damaskus 7	SYR	Landrace	+
496	1575	298158	Aleppo 27	SYR	Landrace	-
497	1577	298160	Tunis 3	TUN	Landrace	+
498	1596	298184	Macedonian 11	MKD	Landrace	-
499	1599	298187	Marodzi	ZWE	Breeders line	+
500	1601	298199	Erythrospermum 12437	AFG	Landrace	-
501	1604	298206	S-12682	AFG	Landrace	+
502	1606	298208	Erinaceum Ovflatum	AFG	Landrace	+
503	1622	298333	Karnobatska Ranasreika	BGR	Breeders line	+
504	1632	298401	Nemerci 301	ROU	Breeders line	+
505	1638	298422	Karcagi 522	HUN	Breeders line	-
506	1639	298423	Mironovskaja 264	UKR	Breeders line	+
507	1649	298451	Retje 89	SVN		+
508	1650	298552	WC 521	IND		+
509	1672	298597	Kirmizi Tir	TUR	Landrace	-
510	1676	298601	B-1775	TUR	Landrace	-
511	1682	298881	Black Shanazi	AFG	Landrace	+
512	1687	298949	Bahri	AFG	Landrace	+
513	1692	300093	Chengdu 9503	CHN	Breeders line	+
514	1694	300561	CI 17260	CHN	Landrace	-
515	1709	301702	CM92354-33M-0Y-0M-6Y-0B-0BGD	MEX	Breeders line	-
516	1718	301723	CM91128-2Y-0M-0Y-3M-0Y-7M-0Y	MEX	Breeders line	+
517	1721	301729	CM81074-17Y-01M-0Y-12M-1Y-0M-0URY	MEX	Breeders line	-
518	1722	301730	CM85835-1Y-0H-0SY-3M-0Y-5M-0Y	MEX	Breeders line	-
519	1733	301757	ICW92.0281-0BR-1AP-2AP-0L-2AP-3AP-0AP	MEX	Breeders line	-
520	1755	301801	CMBW89M3975-16M-0AL-8AL-5B-0Y-0BBY-0Y	MEX	Breeders line	+
521	1756	301803	CM107553-2Y-020Y-010M-1Y-010M-2Y-0M-0SY	MEX	Breeders line	-
522	1764	302050	Cr 14564	USA	Breeders line	-
523	1765	302051	Bridger	USA	Breeders line	-
524	1767	302053	Cr 14583	USA	Breeders line	+
525	1770	302056	Cr 15146	DEU	Breeders line	+
526	1781	302067	Cr 15192	HRV	Breeders line	-
527	1791	302295	AC Avonlea	CAN	Breeders line	+
528	1792	302334	CM91575-7Y-0H-0Y-3M-0Y	MEX	Breeders line	-
529	1793	302335	VULCAN	MEX	Breeders line	-
530	1794	302531	PC Medium-2609	MEX	Breeders line	+
531	1796	302637	Suwindoruko	PRK		+
532	1797	302851	COR 61-545	USA	Breeders line	+
533	1804	302874	Safedak	TJK	Landrace	+
534	1814	303075	AUS 27905	ESP	Landrace	+
535	1817	303078	AUS 28034	BGR	Landrace	-
536	1818	303079	CI 11478	RUS	Landrace	+
537	1820	303081	CI 14451	ETH	Landrace	-
538	1824	303085	CI 14647	ETH	Landrace	-
539	1827	303088	CI 14714	ETH	Landrace	+
540	1843	303106	CI 14896	ETH	Landrace	+
541	1862	303144	CI 7620	RUS	Landrace	+
542	1863	303145	CI 7621	RUS	Landrace	+
543	1870	303152	CI 7729	RUS	Landrace	-
544	1874	303165	C 4989	AUS	Breeders line	+
545	1876	303171	Extra Kolben II	AUS	Breeders line	+
546	1884	303220	Maiorcone	ITA	Landrace	+
547	1886	303222	Pornbacher Graf Toerring	AUT	Breeders line	-
548	1892	303301	PI 166180	IND	Landrace	-
549	1894	303369	Sari	TUR	Landrace	-
550	1895	303370	AUS 8422	TUR	Landrace	+
551	1900	303420	Tir	TUR	Landrace	+
552	1908	303491	Coruche	ESP	Landrace	+
553	1912	303791	Genial	FRA	Breeders line	+
554	1916	307144	Dabat	ETH	Landrace	-
555	1917	307156	Granadero	ARG	Breeders line	-
556	1924	307375	Rieti Todaro 11	ITA	Breeders line	-
557	1926	307434	I 847	ITA	Breeders line	+
558	1929	307443	Mezohegyesi 6282	HUN	Breeders line	+
559	1936	307539	Sarajevo 1	BIH	Landrace	-
560	1940	307543	Crotia 2	HRV	Landrace	-
561	1942	307545	Crotia 18	HRV	Landrace	-
562	1943	307578	Lutescens IX	POL	Breeders line	-
563	1947	308452	AUS 7357	EGY	Landrace	+
564	1948	310342	Jeonju 387	KOR	Breeders line	-
565	1950	310344	Jeonju 389	KOR	Breeders line	+
566	1960	311627	Dian 852-685	CHN	Breeders line	-
567	1961	311633	Liyu 1	CHN	Breeders line	+
a ID displayed at the National agrobiodiversity center (http://genebank.rda.go.kr/)
bAFG-Afghanistan; ARG- Argentina; AUS- Australia; BGR-Bulgaria; BIH- Bosnia and Herzegovina; CAN- Canada; CHN- China; COL- Colombia; DEU- Germany; EGY- Egypt; ESP- Spain; ETH- Ethiopia; FIN- Finland; FRA- France; GRC- Greece; HRV- Croatia; HUN- Hungary; IND- India; ITA- Italy; JPN- Japan; KGZ- Kyrgyzstan; KOR- Republic of korea ;LBN- Lebanon; MEX- Mexico; ROU- Romania; RUS- Russia; SAU- Saudi Ara…
c Indicates the presence or absence of a K-wheat mini CC. + is corresponds to the K-wheat mini CC.
